# Supplementary material for: Thermo-responsive polymer–black phosphorus nanocomposites for NIR-triggered bacterial capture and elimination
Source: Royal Society of Chemistry journal article supplement (doi:10.1039/d1en00658d), 2022-01-01
Supplement: d1en00658d1.pdf [file d1en00658d1.pdf]

## **Thermo-responsive polymer-black phosphorus nanocomposites for NIR-triggered bacterial capture and elimination**

Shuo Deng<sup>a, b, †</sup>, Dongsheng Wang<sup>a, b, †</sup>, Zhiqiang Xiong<sup>a, b</sup>, Siyu Zhang<sup>a</sup>, Dengyu Li<sup>a</sup>, Jin Zeng<sup>a, b</sup>, Xuejiao Zhang<sup>a, \*</sup>, Qing Zhao<sup>a, c, \*</sup>

a. Key Laboratory of Pollution Ecology and Environmental Engineering, Institute of Applied Ecology, Chinese of Academy of Sciences, Shenyang 110016, China

b. University of Chinese Academy of Sciences, Beijing 100049, China

c. National-Regional Joint Engineering Research Center for Soil Pollution Control and Remediation in South China, Guangdong Key Laboratory of Integrated Agro-environmental Pollution Control and Management, Institute of Eco-environmental and Soil Sciences, Guangdong Academy of Sciences, Guangzhou 510650, China

† These authors contributed equally.

\*Corresponding author

Prof. Xuejiao Zhang; E-mail: [zhangxuejiao@iae.ac.cn](mailto:zhangxuejiao@iae.ac.cn)

Prof. Qing Zhao; E-mail: [zhaoqing@iae.ac.cn](mailto:zhaoqing@iae.ac.cn)

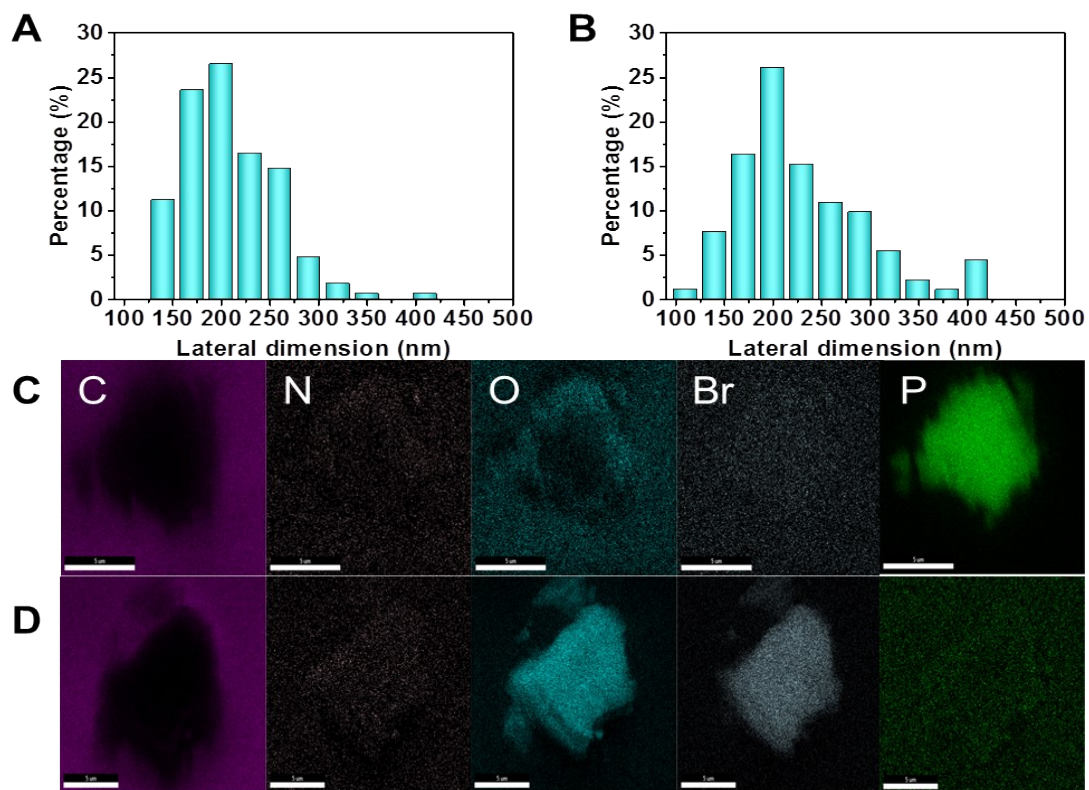

**Fig. S1.** Statistical analysis of lateral dimension from AFM images of BP nanosheets (A) and BP-PNIPAM (B); EDX images of BP nanosheets (C) and BP-PNIPAM (D).

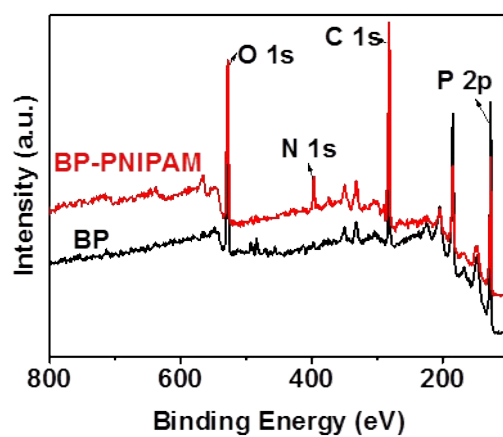

**Fig. S2.** XPS spectra of BP nanosheets and BP-PNIPAM.

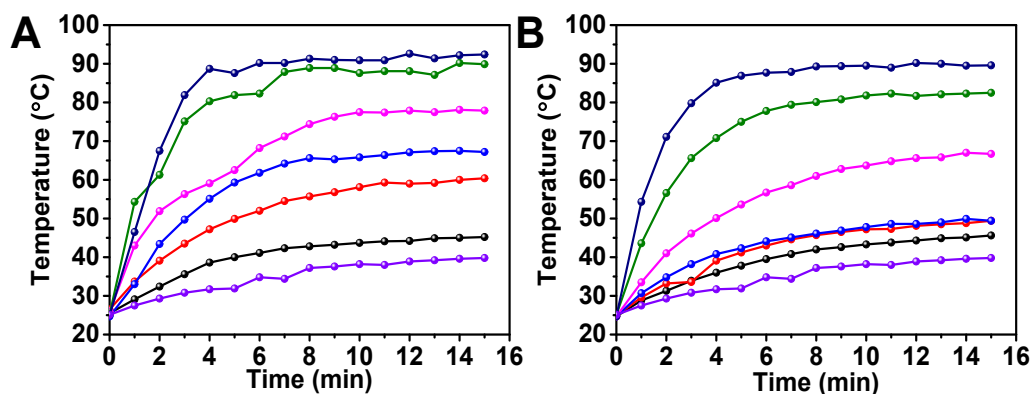

**Fig. S3.** Temperature curve of BP nanosheets (A) and BP-PNIPAM (B) at different concentration (Purple: water; Black:  $10 \mu\text{g mL}^{-1}$ ; Red:  $25 \mu\text{g mL}^{-1}$ ; Blue:  $50 \mu\text{g mL}^{-1}$ ; Pink:  $100 \mu\text{g mL}^{-1}$ ; Green:  $250 \mu\text{g mL}^{-1}$ ; Indigo blue:  $500 \mu\text{g mL}^{-1}$ ) under NIR light ( $808 \text{ nm}$ ,  $2 \text{ W cm}^{-2}$ ) irradiation.

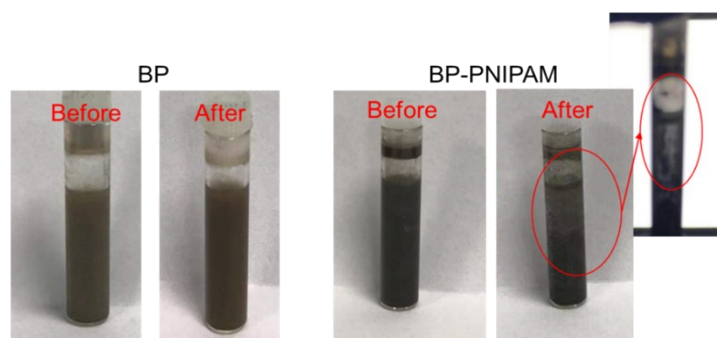

**Fig. S4.** Photographs of BP nanosheets and BP-PNIPAM before and after NIR light ( $808 \text{ nm}$ ,  $2 \text{ W cm}^{-1}$ ) irradiation.

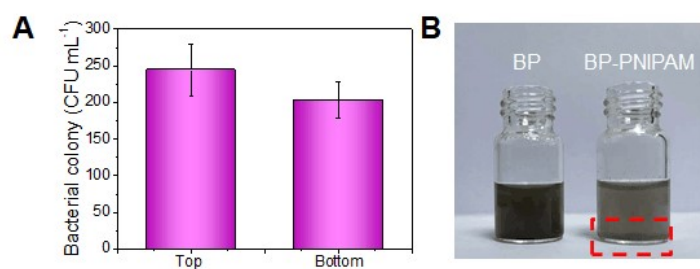

**Fig. S5.** (A) The colony number of *E. coli* in the top and bottom of the culture flask after 5-min standing; (B) Photographs of *E. coli* suspension in the presence of BP nanosheets or BP-PNIPAM ( $200 \mu\text{g mL}^{-1}$ ) after 5-min NIR light ( $808 \text{ nm}$ ,  $2 \text{ W cm}^{-2}$ ) irradiation.

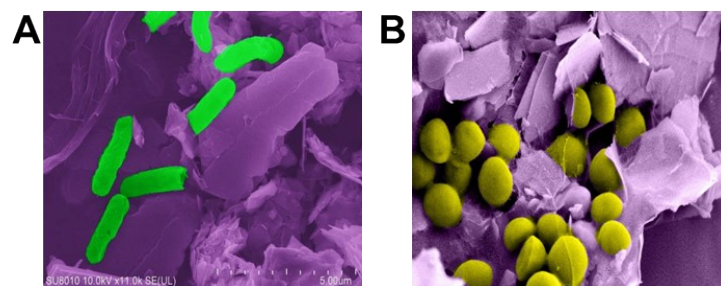

**Fig. S6.** SEM images of *E. coli* (A) and *S. aureus* (B) captured by 200  $\mu\text{g mL}^{-1}$  of BP-PNIPAM under 5-min NIR irradiation (808 nm, 2 W  $\text{cm}^{-2}$ ).

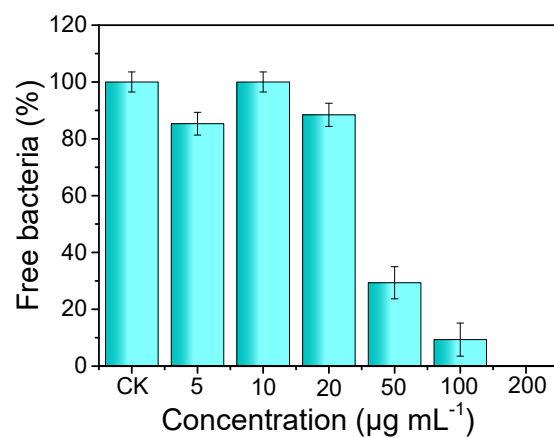

**Figure S7** The capacity of BP-PNIPAM for capturing ampicillin-resistant *E. coli*.

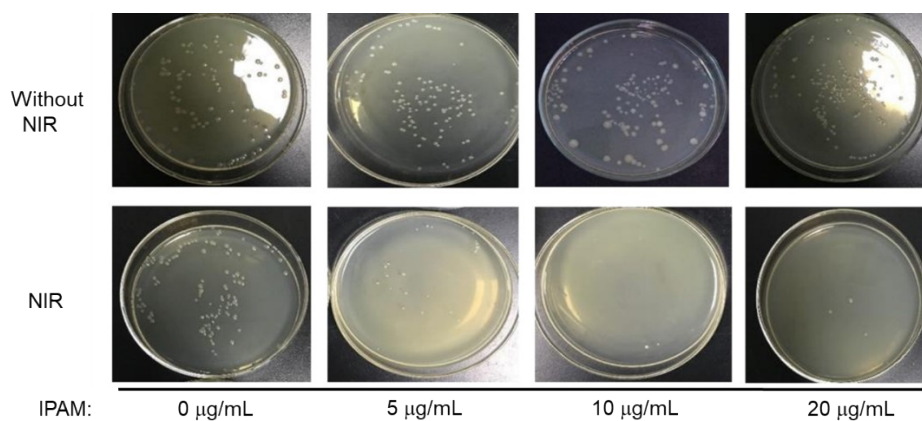

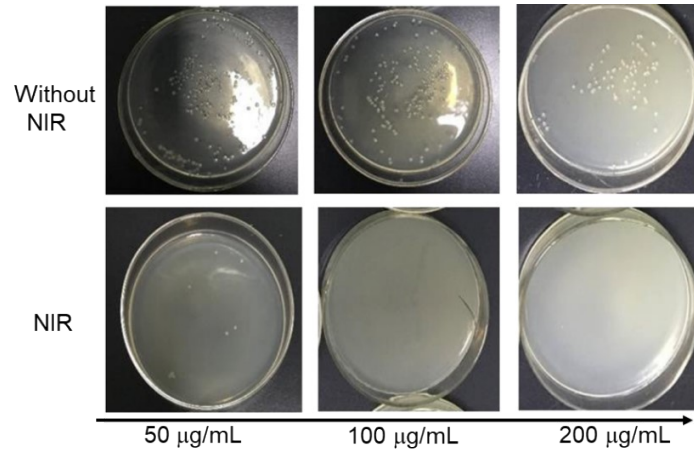

**Fig. S8.** Digital photographs of agar plate of *E. coli* treated with different concentrations of BP-PNIPAM with or without NIR light irradiation.

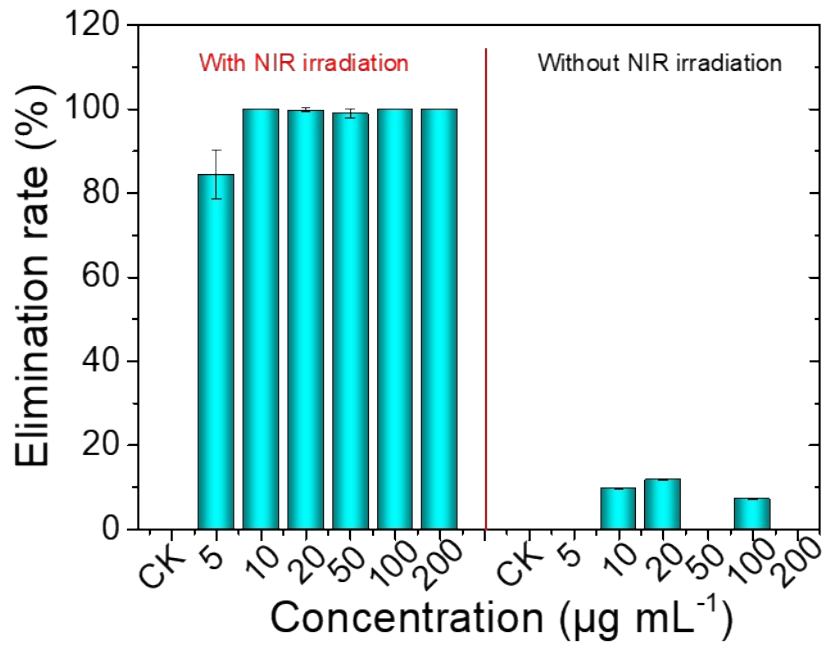

**Figure S9.** Elimination rate of *E. coli* treated with BP-PNIPAM at different concentrations with/without NIR irradiation.

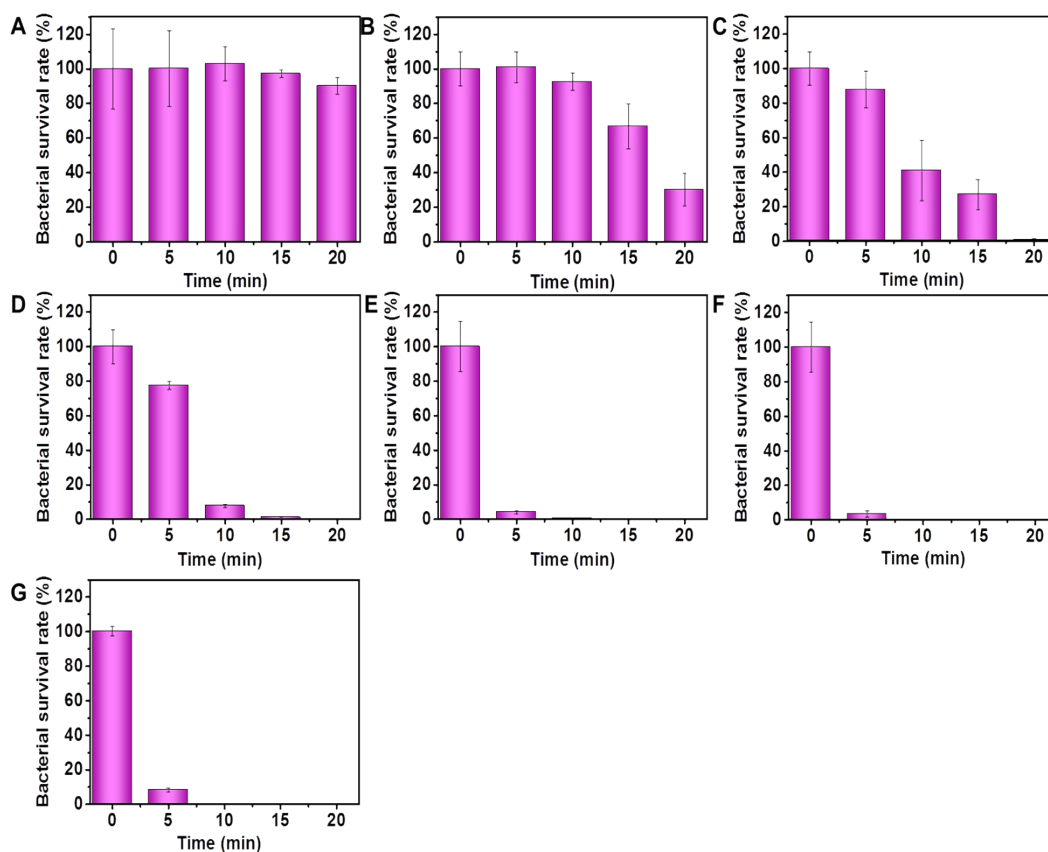

**Fig. S10.** Survival rate of *E. coli* treated with BP-PNIPAM at different concentrations (A: 0; B: 5 µg mL<sup>-1</sup>; C: 10 µg mL<sup>-1</sup>; D: 20 µg mL<sup>-1</sup>; E: 50 µg mL<sup>-1</sup>; F: 100 µg mL<sup>-1</sup>; G: 200 µg mL<sup>-1</sup>) under NIR light irradiation (0-20 min).

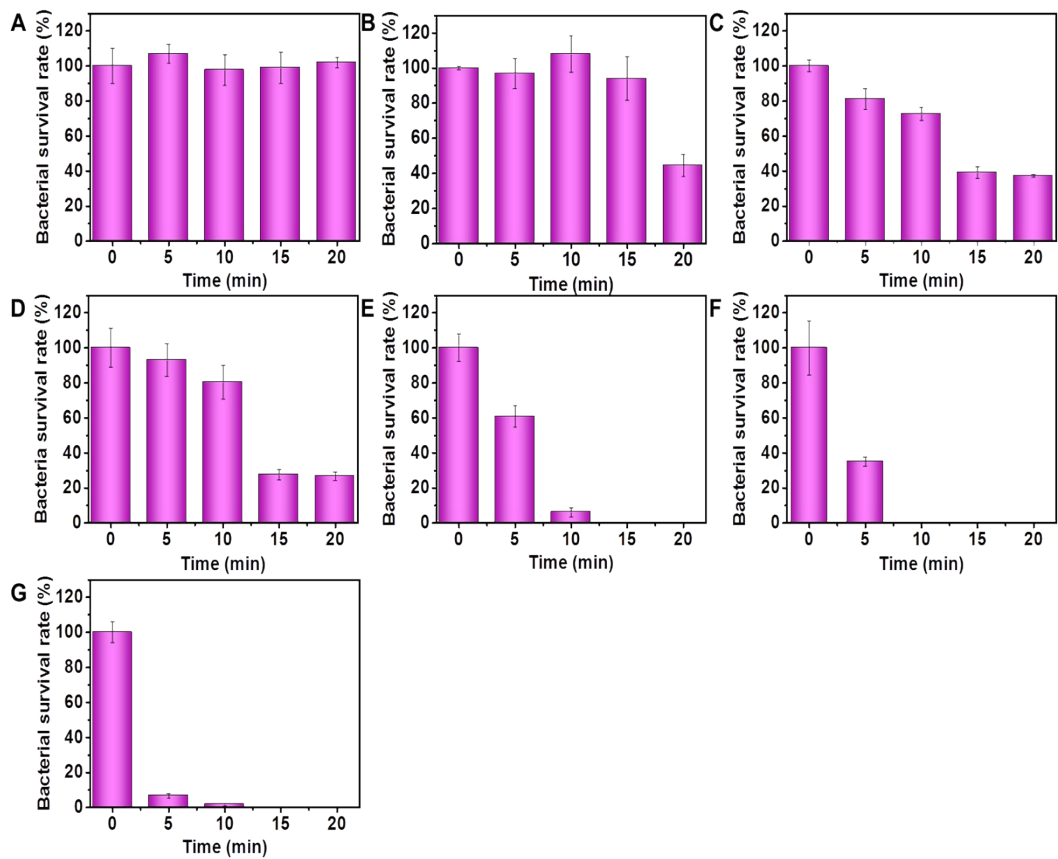

**Fig. S11.** Survival rate of *S. aureus* treated with BP-PNIPAM at different concentrations (A: 0; B: 5  $\mu\text{g mL}^{-1}$ ; C: 10  $\mu\text{g mL}^{-1}$ ; D: 20  $\mu\text{g mL}^{-1}$ ; E: 50  $\mu\text{g mL}^{-1}$ ; F: 100  $\mu\text{g mL}^{-1}$ ; G: 200  $\mu\text{g mL}^{-1}$ ) under NIR light irradiation (0-20 min).

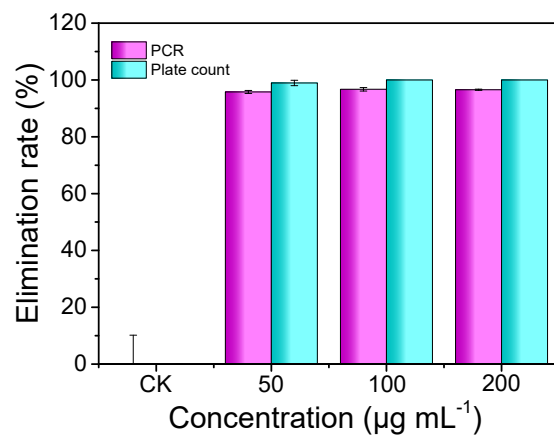

**Fig. S12.** Bacterial elimination by different concentrations of BP-PNIPAM determined by qPCR and colony-counting method.

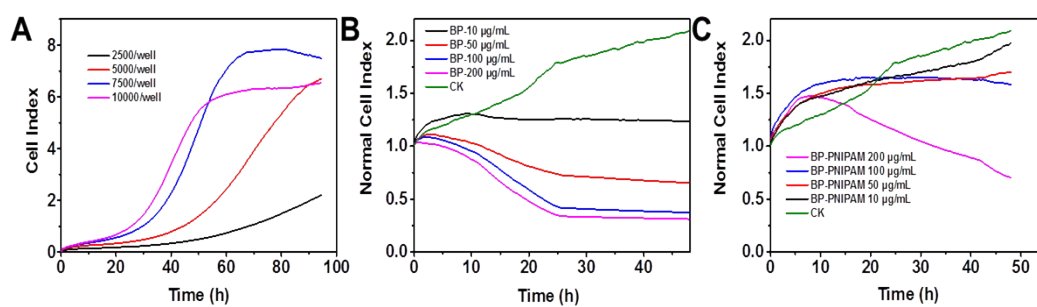

**Fig. S13.** (A) The proliferation profiles of Caco-2 at different culture densities; The proliferation profiles of Caco-2 treated with different concentration of BP nanosheets (B) and BP-PNIPAM (C) monitored by the RTCA device.

**Table S1.** Contents of P, N, O, and C in BP nanosheets and BP-PNIPAM determined by XPS.

| Element | BP nanosheets (At%) | BP-PNIPAM (At%) |
|---------|---------------------|-----------------|
| P       | 41.25               | 25.19           |
| N       | 1.41                | 4.63            |
| O       | 13.64               | 17.23           |
| C       | 43.70               | 52.95           |



**Table S2. The performance of bacterial capture and elimination for the materials reported in the literature.** “C” refers to the materials with bacterial activity; “E” refers to materials with elimination activity; “CE” refers to materials with both bacterial capture and elimination activities; “+” refers to Gram-positive bacteria; “-” refers to Gram-negative bacteria.

|    | Materials                                                           | Particle Size           | Capture dosage          | Capture time | Capture efficiency                                                                             | Driving force     | Elimination dosage                                     | Elimination time | Elimination efficiency                                                                            | Cytotoxicity                        | Nanomaterials (YES/NO) | Ref |
|----|---------------------------------------------------------------------|-------------------------|-------------------------|--------------|------------------------------------------------------------------------------------------------|-------------------|--------------------------------------------------------|------------------|---------------------------------------------------------------------------------------------------|-------------------------------------|------------------------|-----|
| C1 | Fe <sub>3</sub> O <sub>4</sub> @AA                                  | 10 nm                   | 0.8 mg mL <sup>-1</sup> | 20 min       | (-) > 97%, 10 <sup>7</sup> CFU mL <sup>-1</sup>                                                |                   |                                                        |                  |                                                                                                   |                                     | YES                    | 1   |
| C2 | AMP-MNPs                                                            | 280 nm                  | 0.5 mg mL <sup>-1</sup> | 5 s          | (+), (-) > 97%, 10 <sup>7</sup> CFU mL <sup>-1</sup>                                           | -----             | -----                                                  | -----            | -----                                                                                             | -----                               | YES                    | 2   |
| C3 | AF-CoFe <sub>2</sub> O <sub>4</sub>                                 | -----                   | 2 mg mL <sup>-1</sup>   | 60 min       | (+) 100%, 10 <sup>7</sup> CFU mL <sup>-1</sup> ; (-) 65%, 10 <sup>7</sup> CFU mL <sup>-1</sup> | -----             | -----                                                  | -----            | -----                                                                                             | > 85%, 1 mg mL <sup>-1</sup> , 24 h | YES                    | 3   |
| C4 | Fe <sub>3</sub> O <sub>4</sub> @Al <sub>2</sub> O <sub>3</sub> MNPs | 14.5 ± 1.6 nm.          | 500 µg mL <sup>-1</sup> | 60 s         | (+)                                                                                            | -----             | -----                                                  | -----            | -----                                                                                             | -----                               | YES                    | 4   |
| C5 | Fe <sub>3</sub> O <sub>4</sub> @CTAB                                | 10 nm                   | 0.5 g L <sup>-1</sup>   | 60 min       | (+), (-) 99%, 10 <sup>7</sup> CFU mL <sup>-1</sup>                                             | -----             | -----                                                  | -----            | -----                                                                                             | -----                               | YES                    | 5   |
| E1 | CS/ AM NSs hydrogel                                                 | Thickness: 0.85–1.78 nm | -----                   | -----        | -----                                                                                          | Light irradiation | -----                                                  | 10 min           | (-) 97.1%, 10 <sup>6</sup> CFU mL <sup>-1</sup><br>(+) 100%, 10 <sup>6</sup> CFU mL <sup>-1</sup> | 89%, 4 h                            | NO                     | 6   |
| E2 | KGM/Gelatin@Au NPs/ GS                                              | -----                   | -----                   | -----        | -----                                                                                          | -----             | (-) 2 µg mL <sup>-1</sup><br>(+) 4 µg mL <sup>-1</sup> | 480 min          | (+),(-)100%,10 <sup>8</sup> CFU mL <sup>-1</sup>                                                  | 89.04%, 0.01 g, 24 h                | NO                     | 7   |
| E3 | RBC@Fe <sub>3</sub> O <sub>4</sub>                                  | 110 nm                  | -----                   | -----        | -----                                                                                          | Light irradiation | 100 µg mL <sup>-1</sup> of Fe                          | 5min             | (+) 100%, 10 <sup>8</sup> CFU mL <sup>-1</sup>                                                    | -----                               | YES                    | 8   |

|     |                                                                   |             |                            |        |                                                                                                   |                        |                         |         |                                                                                                 |                                      |       |           |
|-----|-------------------------------------------------------------------|-------------|----------------------------|--------|---------------------------------------------------------------------------------------------------|------------------------|-------------------------|---------|-------------------------------------------------------------------------------------------------|--------------------------------------|-------|-----------|
| E4  | Ag-PPAni-II                                                       | -----       | -----                      | -----  | -----                                                                                             | Ag <sup>+</sup>        | -----                   | 6 days  | (+), (-) 100%, 10 <sup>9</sup> CFU mL <sup>-1</sup>                                             | -----                                | NO    | 9         |
| E5  | Melanin powder                                                    | 200 ± 18 nm | -----                      | -----  | -----                                                                                             | Chemical action        | 25 mg mL <sup>-1</sup>  | 62 min  | (-) 88%, 10 <sup>6</sup> CFU mL <sup>-1</sup> ; (+) 100%, 10 <sup>6</sup> CFU mL <sup>-1</sup>  | 50%, 55.6 μg mL <sup>-1</sup> , 48 h | YES   | 10        |
| CE1 | Fe <sub>3</sub> O <sub>4</sub> @SiO <sub>2</sub> -NH <sub>2</sub> | 10 – 53 nm  | 6 mg mL <sup>-1</sup>      | 10 min | (+) 96%, 10 <sup>9</sup> CFU mL <sup>-1</sup> ; (-) 96%, 10 <sup>8</sup> CFU mL <sup>-1</sup>     | radiofrequency current | 1 mg mL <sup>-1</sup>   | 30 min  | 100%, 10 <sup>8</sup> CFU mL <sup>-1</sup>                                                      | -----                                | YES   | 11        |
| CE2 | MoS <sub>2</sub> -Hydrogel                                        | -----       | -----                      | 30 min | (+) 37.3%, 10 <sup>6</sup> CFU mL <sup>-1</sup> ; (-) 27.3%, 10 <sup>6</sup> CFU mL <sup>-1</sup> | Light irradiation      | -----                   | 300 min | (+), 10 <sup>6</sup> CFU mL <sup>-1</sup><br>(-), 10 <sup>6</sup> CFU mL <sup>-1</sup>          | 90%, 24 h                            | NO    | 12        |
| CE3 | Ag@Fe <sub>2</sub> O <sub>3</sub> yolk-shell                      | -----       | 128 μg mL <sup>-1</sup>    | 30 min | (-) 99%, 10 <sup>7</sup> CFU mL <sup>-1</sup>                                                     | -----                  | 128 μg mL <sup>-1</sup> | 30 min  | (-), 100% 10 <sup>7</sup> CFU mL <sup>-1</sup>                                                  | -----                                | YES   | 13        |
| @   | BP-PNIPAM                                                         | -----       | 50-100 μg mL <sup>-1</sup> | 5 min  | (+) >90%, 10 <sup>7</sup> CFU mL <sup>-1</sup> ; (-) >80%, 10 <sup>7</sup> CFU mL <sup>-1</sup>   | Light irradiation      | 20 μg mL <sup>-1</sup>  | 20 min  | (+) 100%, 10 <sup>7</sup> CFU mL <sup>-1</sup> ; (-) 100%, 10 <sup>7</sup> CFU mL <sup>-1</sup> | > 90%, 50 μg mL <sup>-1</sup> , 48 h | ----- | This work |

**Notice:** Fe<sub>3</sub>O<sub>4</sub>@AA represents amino acids functionalized Fe<sub>3</sub>O<sub>4</sub>; AMP-MNPs represent antimicrobial peptide functionalized Fe<sub>3</sub>O<sub>4</sub>; AF-CoFe<sub>2</sub>O<sub>4</sub> represents amine-functionalized cobalt ferrite; Fe<sub>3</sub>O<sub>4</sub>@Al<sub>2</sub>O<sub>3</sub> MNPs represent aluminum oxide-coated iron oxide (Fe<sub>3</sub>O<sub>4</sub>@Al<sub>2</sub>O<sub>3</sub>) MNPs with the peptide HHHHHHDEEGLFVD; Fe<sub>3</sub>O<sub>4</sub>@CTAB represents Fe<sub>3</sub>O<sub>4</sub> nanoparticles modified with cetyltrimethylammonium bromide (CTAB); CS/AM NSs hydrogel represents chitosan hydrogel with antimonene nanosheets; KGM/Gelatin@Au NPs/GS represents mixture of konjac glucomannan (KGM) and gelatin enveloping Au NPs mixed with gentamicin sulfate (GS); RBC@Fe<sub>3</sub>O<sub>4</sub> represents red blood cell membrane-coated Fe<sub>3</sub>O<sub>4</sub> nanoparticles; Ag-PPAni-II represents silver (Ag) and plasma polymerized aniline (PPAni) composite.

## Reference

1. Y. Jin, F. Liu, C. Shan, M. Tong and Y. Hou, Efficient bacterial capture with amino acid modified magnetic nanoparticles, *Water Research*, 2014, **50**, 124-134.
2. S.-Y. Ding, Y. Faraj, J. Wei, W. Wang, R. Xie, Z. Liu, X.J. Ju and L.Y. Chu, Antimicrobial peptide-functionalized magnetic nanoparticles for rapid capture and removal of pathogenic bacteria, *Microchemical Journal*, 2020, **159**.
3. R. A. Bohara, N. D. Throat, N. A. Mulla and S. H. Pawar, Surface-Modified Cobalt Ferrite Nanoparticles for Rapid Capture, Detection, and Removal of Pathogens: a Potential Material for Water Purification, *Applied Biochemistry and Biotechnology*, 2016, **182**, 598-608.
4. F.Y. Kuo, W.L. Lin and Y.C. Chen, Affinity capture using peptide-functionalized magnetic nanoparticles to target *Staphylococcus aureus*, *Nanoscale*, 2016, **8**, 9217-9225.
5. Y. Jin, J. Deng, J. Liang, C. Shan and M. Tong, Efficient bacteria capture and inactivation by cetyltrimethylammonium bromide modified magnetic nanoparticles, *Colloids and Surfaces B: Biointerfaces*, 2015, **136**, 659-665.
6. Y. Liu, Y. Xiao, Y. Cao, Z. Guo, F. Li and L. Wang, Construction of Chitosan-Based Hydrogel Incorporated with Antimonene Nanosheets for Rapid Capture and Elimination of Bacteria, *Advanced Functional Materials*, 2020, **30**.
7. Y. Zou, R. Xie, E. Hu, P. Qian, B. Lu, G. Lan and F. Lu, Protein-reduced gold nanoparticles mixed with gentamicin sulfate and loaded into konjac/gelatin sponge heal wounds and kill drug-resistant bacteria, *International Journal of Biological Macromolecules*, 2020, **148**, 921-931.
8. B. Chen, F. Li, X. K. Zhu, W. Xie, X. Hu, M. H. Zan, X. Li, Q.Y. Li, S.S. Guo, X.Z. Zhao, Y.a. Jiang, Z. Cao and W. Liu, Highly biocompatible and recyclable biomimetic nanoparticles for antibiotic-resistant bacteria infection, *Biomaterials Science*, 2021, **9**, 826-834.
9. M. Agarwala, T. Barman, D. Gogoi, B. Choudhury, A. R. Pal and R. N. S. Yadav, Highly effective antibiofilm coating of silver-polymer nanocomposite on polymeric medical devices deposited by one step plasma process, *Journal of Biomedical Materials Research Part B: Applied Biomaterials*, 2014, **102**, 1223-1235.
10. N. T. Le Na, B. T. Van Khanh, P. Xuan Huy, H. T. M. Nhung, N. Thi Van Anh and N. D. Thang, Melanin biomaterial effectively eliminates bacteria from water and synergistically induces melanoma-cell death during X-ray irradiation, *Materials Technology*, 2020, **36**, 261-269.
11. A. K. Chaurasia, N. D. Thorat, A. Tandon, J.-H. Kim, S. H. Park and K. K. Kim, Coupling of radiofrequency with magnetic nanoparticles treatment as an alternative physical antibacterial strategy against multiple drug resistant bacteria, *Scientific Reports*, 2016, **6**.
12. Y. Sang, W. Li, H. Liu, L. Zhang, H. Wang, Z. Liu, J. Ren and X. Qu, Construction of Nanozyme-Hydrogel for Enhanced Capture and Elimination of Bacteria, *Advanced Functional Materials*, 2019, **29**.
13. Z. Wei, Z. Zhou, M. Yang, C. Lin, Z. Zhao, D. Huang, Z. Chen and J. Gao, Multifunctional Ag@Fe<sub>2</sub>O<sub>3</sub> yolk-shell nanoparticles for simultaneous capture, kill, and removal of pathogen, *Journal of Materials Chemistry*, 2011, **21**.
